# Supplementary material
Source: PubMed Central journal article supplement (PMC5985214)
Supplement: NIHMS950512-supplement.pdf [file NIHMS950512-supplement.pdf]

**SUPPLEMENTARY MATERIALS for *Maytin et al.***

**Table of Contents**

|                          |                                                               |
|--------------------------|---------------------------------------------------------------|
| <b>Supplem. Methods.</b> | Analysis of Photographs to Obtain a DSE Composite Tumor Score |
| <b>Supplem. Table A.</b> | Lesion Diameter and Composite Scores for Tumors of Patient A  |
| <b>Supplem. Table B.</b> | Lesion Diameter and Composite Scores for Tumors of Patient B  |
| <b>Supplem. Table C.</b> | Lesion Diameter and Composite Scores for Tumors of Patient C  |

## SUPPLEMENTARY METHODS

### Analysis of Photographs to Obtain a DSE Composite Tumor Score

Photographic images were cropped and assembled in Adobe Photoshop, and displayed on a high resolution monitor (Apple iMac 21" Retina display). If the millimeter scale from the same photograph would be outside the field of view, it was copy-pasted to lie alongside each BCC lesion for comparison. In addition, an artificial color scale (with 7 different shades of red) was added to each photograph for an assessment of erythema.

Three separate measurements were then made by the primary evaluator (U.W.) to produce a descriptive, composite score. The procedure is illustrated in [Figure 2](#). First, the lesion diameter (D) was estimated from the millimeter scale. (Any absent lesion was arbitrarily set at D=1). Second, we attempted to take into account the vertical disposition of the tumor; it is not possible to actually measure the depth of a tumor from a photograph, but some idea of the tumor activity (scaling, erosion, or elevation due to edema) can be obtained by noting epidermal surface changes. Therefore, the appearance of the lesion's surface (S) was evaluated and assigned a number (H = 2 if raised, eroded, or scaly; H=1 if flat). To assess erythema (E), the artificial color scale was compared to the tumor, and the nearest color match was recorded. Based upon 7 different shades of pink to red, it was possible to interpolate between the shades and choose a number from 0 to 14. Normal skin also has some degree of erythema; therefore color readings of normal skin were also recorded at three peritumoral locations, and an average background value was subtracted to obtain a background-corrected tumor erythema score. Using all three parameters, a composite score (DSE) was calculated by multiplying the three factors (D x S x E). In the Supplementary Tables A-C, one can see that tumors that were completely resolved at Visit 7 have a DSE composite score of zero or close to zero. (Negative values are due to variability introduced by the erythema background correction).

**Supplementary Table A.** Lesion Diameter and Composite Scores for the BCC Tumors of Patient A

|                    |                       |                              |               | DSE Composite Scores <sup>[2]</sup> |            |                |            |              |            |           |                                              |
|--------------------|-----------------------|------------------------------|---------------|-------------------------------------|------------|----------------|------------|--------------|------------|-----------|----------------------------------------------|
|                    |                       |                              |               | Low fluence                         |            | Medium fluence |            | High fluence |            | No Rx     |                                              |
| Lesion No. (final) | Lesion No. (original) | Diameter (mm) <sup>[1]</sup> | Type of Light | Visit 1                             | Visit 2    | Visit 3        | Visit 4    | Visit 5      | Visit 6    | Visit 7   | Number of Treatments to Clear <sup>[3]</sup> |
| A1                 | Scalp-1               | 5                            | Blue          | <b>77</b>                           | <b>11</b>  | <u>3</u>       | <b>117</b> | <u>5</u>     | <u>3</u>   | <u>1</u>  | <b>4</b>                                     |
| A2                 | Scalp-2               | 6                            | Blue          | <b>40</b>                           | <b>47</b>  | <u>5</u>       | <b>117</b> | <u>5</u>     | <b>56</b>  | <u>1</u>  | <b>6</b>                                     |
| A3                 | Scalp-3               | 4                            | Blue          | <b>53</b>                           | <b>70</b>  | <b>11</b>      | <b>70</b>  | <b>11</b>    | <b>47</b>  | <u>1</u>  | <b>6</b>                                     |
| A4                 | Scalp-4               | 2                            | Blue          | <b>11</b>                           | <b>47</b>  | <u>3</u>       | <b>117</b> | <b>11</b>    | <b>80</b>  | <u>1</u>  | <b>6</b>                                     |
| A5                 | Scalp-5               | 3                            | Blue          | <b>17</b>                           | <b>64</b>  | <u>3</u>       | <b>140</b> | <b>11</b>    | <u>7</u>   | <u>1</u>  | <b>5</b>                                     |
| A6                 | Scalp-6               | 3                            | Blue          | <b>17</b>                           | <b>12</b>  | <u>3</u>       | <b>117</b> | <b>13</b>    | <b>120</b> | <u>1</u>  | <b>6</b>                                     |
| A7                 | Face-20               | 2                            | Blue          | <b>13</b>                           | <b>52</b>  | <u>1</u>       | <u>3</u>   | <u>4</u>     | <u>5</u>   | <u>3</u>  | <b>2</b>                                     |
| A8                 | Face-21               | 20                           | Blue          | <b>107</b>                          | <b>187</b> | <b>11</b>      | <b>43</b>  | <b>30</b>    | <b>88</b>  | <u>1</u>  | <b>6</b>                                     |
| A9                 | Scalp-14              | 3                            | Red           | <b>12</b>                           | <b>32</b>  | <u>6</u>       | <u>8</u>   | <u>7</u>     | <b>160</b> | <u>2</u>  | <b>6</b>                                     |
| A10                | Scalp-15              | 4                            | Red           | <b>16</b>                           | <b>32</b>  | <u>6</u>       | <u>6</u>   | <u>7</u>     | <b>16</b>  | <u>2</u>  | <b>6</b>                                     |
| A11*               | Scalp-16              | <b>3</b>                     | <b>Red</b>    | <b>24</b>                           | <b>20</b>  | <b>60</b>      | <b>64</b>  | <b>36</b>    | <b>120</b> | <b>72</b> | <b>NR *</b>                                  |
| A12                | Scalp-17              | 4                            | Red           | <b>24</b>                           | <b>24</b>  | <b>12</b>      | <b>48</b>  | <b>15</b>    | <b>154</b> | <u>6</u>  | <b>6</b>                                     |
| A13                | Face-10               | 5                            | Red           | <b>70</b>                           | <b>96</b>  | <b>10</b>      | <b>24</b>  | <b>8</b>     | <b>16</b>  | <u>4</u>  | <b>6</b>                                     |
| A14*               | Face-12               | <b>4</b>                     | <b>Red</b>    | <b>29</b>                           | <b>37</b>  | <u>1</u>       | <u>3</u>   | <u>5</u>     | <b>45</b>  | <b>13</b> | <b>PR *</b>                                  |
| A15                | Face-13               | 2                            | Red           | <b>22</b>                           | <b>32</b>  | <u>4</u>       | <b>18</b>  | <u>2</u>     | <u>5</u>   | <u>1</u>  | <b>4</b>                                     |

**FOOTNOTES TO SUPPLEMENTARY TABLE A.**

<sup>[1]</sup> Initial size of tumor (diameter, in millimeters).

<sup>[2]</sup> DSE composite scores were calculated as product of (diameter) x (surface change) x (erythema). Numbers that are underlined correspond to lesions judged to be clinically undetectable on the day of that study visit. Numbers in **bold** indicate that the DSE score is above the DSE threshold of detection; the latter is defined as the mean of all the underlined DSE scores + 2 x (Std Dev). The threshold DSE score in this patient: mean ± 2 SD = **7.8**

<sup>[3]</sup> Number of PDT treatments needed to clear the lesion. To be defined as a complete response, the DSE score had to be below the DSE threshold of detection at visit 7, or if the DSE score was below the threshold at an earlier visit, it had to remain below threshold at all subsequent visits.

PR, partial response. NR, nonresponse. CR, complete response.

\* These lesions were biopsied with the following diagnostic results:

Lesion **A11**, right scalp: "BCC, nodular and micronodular types" (red light)

Lesion **A14**, right forehead: "BCC, nodular and micronodular types" (red light)

**Supplementary Table B.** Lesion Diameter and Composite Scores for the BCC Tumors of Patient B

|                    |                       |                              |               | DHE Composite Scores <sup>[2]</sup> |          |                |          |              |           |           |                                              |
|--------------------|-----------------------|------------------------------|---------------|-------------------------------------|----------|----------------|----------|--------------|-----------|-----------|----------------------------------------------|
|                    |                       |                              |               | Low fluence                         |          | Medium fluence |          | High fluence |           | No Rx     |                                              |
| Lesion No. (final) | Lesion No. (original) | Diameter (mm) <sup>[1]</sup> | Type of Light | Visit 1                             | Visit 2  | Visit 3        | Visit 4  | Visit 5      | Visit 6   | Visit 7   | Number of Treatments to Clear <sup>[3]</sup> |
| B1                 | Face-41               | 3                            | Blue          | 46                                  | 76       | 9              | 12       | <u>1</u>     | 21        | <u>1</u>  | 6                                            |
| B2                 | Face-42               | 3                            | Blue          | 58                                  | 93       | <u>3</u>       | <u>4</u> | <u>1</u>     | 76        | <u>1</u>  | 6                                            |
| B3                 | Face-43               | 4                            | Blue          | 45                                  | 77       | <u>3</u>       | 22       | <u>1</u>     | <u>5</u>  | <u>1</u>  | 6                                            |
| B4                 | Face-37               | 1                            | Blue          | 5                                   | 5        | <u>1</u>       | 4        | <u>1</u>     | <u>-1</u> | <u>-1</u> | 4                                            |
| B5                 | Face-38               | 2                            | Blue          | 9                                   | 114      | <u>1</u>       | <u>4</u> | <u>1</u>     | <u>-1</u> | <u>-1</u> | 4                                            |
| B6                 | Face-39               | 2                            | Blue          | 9                                   | 95       | <u>3</u>       | <u>4</u> | <u>1</u>     | <u>-1</u> | <u>-1</u> | 4                                            |
| B7                 | Face-40               | 2                            | Blue          | 9                                   | 77       | <u>3</u>       | <u>4</u> | <u>1</u>     | <u>-1</u> | <u>-1</u> | 4                                            |
| B8                 | Face-1                | 6                            | Red           | 30                                  | 157      | 42             | 25       | <u>3</u>     | 69        | <u>3</u>  | 6                                            |
| B9                 | Face-2                | 3                            | Red           | 62                                  | 4        | 4              | 6        | <u>2</u>     | 4         | <u>2</u>  | 6                                            |
| B10                | Face-8                | 7                            | Red           | 77                                  | 90       | 31             | 114      | <u>3</u>     | <u>1</u>  | <u>3</u>  | 4                                            |
| B11                | Face-9                | 7                            | Red           | 86                                  | 200      | 4              | <u>3</u> | <u>3</u>     | <u>0</u>  | <u>2</u>  | 3                                            |
| B12                | Face-10               | 4                            | Red           | 18                                  | <u>3</u> | <u>3</u>       | <u>3</u> | <u>3</u>     | <u>6</u>  | <u>2</u>  | 6                                            |
| B13                | Scalp-14              | 8                            | Blue          | 119                                 | 199      | <u>3</u>       | 77       | <u>3</u>     | 9         | <u>1</u>  | 6                                            |
| B14                | Scalp-15              | 2                            | Blue          | 47                                  | 34       | <u>3</u>       | 66       | <u>3</u>     | 13        | <u>1</u>  | 6                                            |
| B15                | Scalp-16              | 5                            | Blue          | 15                                  | 18       | <u>1</u>       | 23       | <u>1</u>     | 13        | <u>-1</u> | 6                                            |
| B16                | Scalp-17              | 5                            | Blue          | 42                                  | 50       | 4              | 74       | <u>4</u>     | 10        | <u>2</u>  | 6                                            |
| B17                | Scalp-18              | 7                            | Blue          | 21                                  | 18       | <u>1</u>       | 119      | <u>1</u>     | 9         | <u>-1</u> | 6                                            |
| B18                | Scalp-19              | 4                            | Blue          | 45                                  | 29       | <u>3</u>       | <u>3</u> | <u>1</u>     | 5         | <u>-1</u> | 6                                            |
| B19                | Scalp-32              | 4                            | Blue          | 29                                  | 49       | <u>3</u>       | <u>4</u> | <u>1</u>     | <u>3</u>  | <u>1</u>  | 4                                            |
| B20                | Scalp-33              | 6                            | Blue          | 18                                  | 49       | <u>3</u>       | <u>1</u> | <u>1</u>     | 5         | <u>1</u>  | 6                                            |
| B21                | Scalp-34              | 6                            | Blue          | 90                                  | 114      | <u>3</u>       | 49       | 15           | 62        | <u>1</u>  | 6                                            |
| B22                | Scalp-35              | 5                            | Blue          | 35                                  | 130      | <u>3</u>       | 42       | <u>1</u>     | 62        | <u>1</u>  | 6                                            |
| B23                | Scalp-36              | 5                            | Blue          | 55                                  | 23       | <u>3</u>       | 22       | <u>1</u>     | 22        | <u>1</u>  | 6                                            |
| B24                | Scalp-3               | 3                            | Red           | 50                                  | 6        | 4              | 6        | <u>2</u>     | <u>2</u>  | <u>2</u>  | 4                                            |
| B25                | Scalp-4               | 5                            | Red           | 62                                  | 74       | 4              | 6        | <u>2</u>     | 4         | <u>2</u>  | 6                                            |
| B26 *              | Scalp-5               | 7                            | Red           | 161                                 | 183      | 1              | 90       | 23           | 14        | 32        | PR *                                         |
| B27                | Scalp-6               | 6                            | Red           | 102                                 | 46       | <u>1</u>       | 31       | <u>3</u>     | <u>1</u>  | <u>1</u>  | 4                                            |
| B28                | Scalp-7               | 5                            | Red           | 55                                  | 90       | 15             | 75       | 23           | 9         | <u>1</u>  | 6                                            |
| B29                | Neck-28               | 6                            | Blue          | 66                                  | 75       | <u>3</u>       | 4        | <u>3</u>     | <u>1</u>  | <u>1</u>  | 4                                            |
| B30                | Neck-29               | 3                            | Blue          | 10                                  | <u>3</u> | <u>3</u>       | 4        | <u>3</u>     | <u>1</u>  | <u>1</u>  | 4                                            |
| B31                | Neck-30               | 8                            | Blue          | 87                                  | 77       | <u>3</u>       | 4        | <u>3</u>     | <u>1</u>  | <u>1</u>  | 4                                            |
| B32                | Neck-31               | 4                            | Blue          | 45                                  | 23       | <u>3</u>       | 4        | <u>3</u>     | <u>1</u>  | <u>1</u>  | 4                                            |
| B33                | Neck-11               | 6                            | Red           | 130                                 | 130      | 7              | 18       | 37           | 95        | <u>1</u>  | 6                                            |
| B34                | Neck-13               | 5                            | Red           | 89                                  | 69       | <u>3</u>       | <u>3</u> | <u>3</u>     | <u>3</u>  | <u>1</u>  | 2                                            |
| B35                | Neck-20               | 4                            | Red           | 45                                  | 75       | 5              | <u>1</u> | <u>-1</u>    | <u>-1</u> | <u>-1</u> | 3                                            |
| B36                | Neck-21               | 4                            | Red           | 45                                  | 75       | 5              | 77       | <u>1</u>     | <u>-1</u> | <u>-1</u> | 4                                            |
| B37                | Neck-22               | 5                            | Red           | 29                                  | 85       | 5              | <u>3</u> | <u>1</u>     | <u>-1</u> | <u>-1</u> | 3                                            |
| B38                | Neck-23               | 5                            | Red           | 29                                  | 77       | 12             | <u>3</u> | <u>1</u>     | <u>1</u>  | <u>-1</u> | 3                                            |
| B39                | Neck-24               | 5                            | Red           | 55                                  | 45       | 9              | <u>3</u> | <u>-1</u>    | <u>-1</u> | <u>-1</u> | 3                                            |
| B40                | Neck-25               | 4                            | Red           | 61                                  | 75       | <u>3</u>       | <u>3</u> | <u>1</u>     | <u>1</u>  | <u>1</u>  | 2                                            |
| B41                | Neck-26               | 3                            | Red           | 22                                  | 55       | <u>3</u>       | <u>3</u> | <u>1</u>     | <u>1</u>  | <u>1</u>  | 2                                            |
| B42                | Back-27               | 3                            | Red           | 50                                  | 8        | 6              | 4        | 4            | 2         | <u>2</u>  | 5                                            |

## FOOTNOTES TO SUPPLEMENTARY TABLE B.

- [1] Initial size of tumor (diameter, in millimeters).
- [2] DSE composite scores were calculated as product of (diameter) x (surface change) x (erythema). Numbers that are underlined correspond to lesions judged to be clinically undetectable on the day of that study visit. Numbers in **bold** indicate that the DSE score is above the DSE threshold of detection; the latter is defined as the mean of all the underlined DSE scores + 2 x (Std Dev). The threshold DSE score in this patient: mean  $\pm$  2 SD = **3.12**
- [3] Number of PDT treatments needed to clear the lesion. To be defined as a complete response, the DSE score had to be below the DSE threshold of detection at visit 7, or if the DSE score was below the threshold at an earlier visit, it had to remain below threshold at all subsequent visits.

PR, partial response. NR, nonresponse. CR, complete response.

- \* This lesion was biopsied with the following diagnostic result:  
Lesion **B26**, left scalp: "Basal cell carcinoma, nodular type" (red light)

**Supplementary Table C.** Lesion Diameter and Composite Scores for the BCC Tumors of Patient C

DSE Composite Scores <sup>[2]</sup>

| Lesion No. (final) | Lesion No. (original) | Diameter (mm) <sup>[1]</sup> | Type of Light | DSE Composite Scores <sup>[2]</sup> |         |                |         |              |         |         | Number of Treatments to Clear <sup>[3]</sup> |
|--------------------|-----------------------|------------------------------|---------------|-------------------------------------|---------|----------------|---------|--------------|---------|---------|----------------------------------------------|
|                    |                       |                              |               | Low fluence                         |         | Medium fluence |         | High fluence |         | No Rx   |                                              |
|                    |                       |                              |               | Visit 1                             | Visit 2 | Visit 3        | Visit 4 | Visit 5      | Visit 6 | Visit 7 |                                              |
| C1                 | Arm-8                 | 3                            | Blue          | 38                                  | 93      | 8.7            | 2.3     | 1.3          | 3.3     | -0.7    | 3                                            |
| C2                 | Arm-9                 | 3                            | Blue          | 13                                  | 133     | 26             | 6.7     | 10           | 10      | 1.3     | 6                                            |
| C3                 | Arm-10                | 3                            | Blue          | 38                                  | 100     | 38             | 21      | 6.7          | 6.7     | -0.7    | 6                                            |
| C4                 | Arm-11                | 5                            | Blue          | 30                                  | 176     | 10             | 8.0     | 10           | 10      | -2.0    | 6                                            |
| C5                 | Arm-12                | 5                            | Blue          | 15                                  | 72      | 40             | 40      | 9.0          | 4.0     | 2.0     | 5                                            |
| C6                 | Arm-13                | 2                            | Blue          | 12                                  | 80      | 8.0            | 12      | -2.0         | 0.0     | -4.0    | 4                                            |
| C7                 | Arm-14                | 4                            | Blue          | 24                                  | 128     | 16             | 24      | -2.0         | 3.0     | -2.0    | 4                                            |
| C8                 | Arm-15                | 6                            | Blue          | 80                                  | 92      | 80             | 47      | 7.3          | 6.7     | 0.7     | 6                                            |
| C9                 | Arm-16                | 3                            | Blue          | 48                                  | 120     | 8.0            | 2.0     | 3.0          | 8.9     | 0.0     | 6                                            |
| C10                | Arm-17                | 5                            | Blue          | 90                                  | 144     | 7.0            | 5.0     | 3.0          | 3.3     | 0.0     | 3                                            |
| C11 <sup>[5]</sup> | Arm-21                | 4                            | Blue          | 45                                  | 139     | 40             | 53      | 8.0          | 8.0     | 8.0     | Benign <sup>[5]</sup>                        |
| C12 <sup>[5]</sup> | Arm-22                | 3                            | Blue          | 48                                  | 200     | 28             | 21      | 8            | 1.0     | 0.0     | 5                                            |
| C13 <sup>[5]</sup> | Arm-23                | 3                            | Blue          | 36                                  | 156     | 24             | 24      | 22           | 22      | 22      | Benign <sup>[5]</sup>                        |
| C14                | Arm-24                | 2                            | Blue          | 36                                  | 182     | 70             | 10      | 8            | 8       | 2.0     | 6                                            |
| C15                | Arm-25                | 3                            | Blue          | 90                                  | 192     | 35             | 28      | 14           | 5.0     | 3.0     | 5                                            |
| C16                | Arm-26                | 3                            | Blue          | 48                                  | 80      | 20             | 3.0     | 0.0          | -1.0    | -2.0    | 3                                            |
| C17                | Arm-27                | 3                            | Blue          | 56                                  | 68      | 22             | 44      | 3.3          | 11      | -0.7    | 6                                            |
| C18                | Arm-1                 | 3                            | Red           | 46                                  | 87      | -0.3           | 1.3     | -2.3         | -2.3    | 0.7     | 2                                            |
| C19                | Arm-2                 | 3                            | Red           | 11                                  | 113     | 11             | 37      | -2.3         | 1.7     | 0.7     | 4                                            |
| C20                | Arm-3                 | 4                            | Red           | 53                                  | 210     | 53             | 107     | 11           | 93      | 0.7     | 6                                            |
| C21                | Arm-4                 | 3                            | Red           | 26                                  | 168     | 44             | 32      | -7.3         | 0.3     | -0.7    | 4                                            |
| C22                | Arm-5                 | 6                            | Red           | 76                                  | 112     | 28             | 43      | 10           | 32      | 1.3     | 6                                            |
| C23                | Arm-6                 | 3                            | Red           | 26                                  | 93      | 33             | 64      | 13           | 17      | -0.7    | 6                                            |
| C24                | Arm-7                 | 4                            | Red           | 29                                  | 69      | 45             | 44      | 11           | 15      | -1.3    | 6                                            |
| C25 <sup>[4]</sup> | Arm-8                 | 4                            | Red           | 64                                  | 108     | 42             | 48      | 18           | 288     | 16      | PR <sup>[4]</sup>                            |
| C26                | Arm-19                | 6                            | Red           | 40                                  | 67      | 20             | 20      | 9.0          | 6.6     | -0.7    | 6                                            |
| C27                | Arm-20                | 3                            | Red           | 33                                  | 35      | 10             | 10      | -1.7         | 3.0     | -2.7    | 4                                            |
| C28                | Leg-1                 | 7                            | Blue          | 107                                 | 128     | 67             | 4.7     | 19           | 47      | -1.3    | 6                                            |
| C29                | Leg-2                 | 10                           | Blue          | 133                                 | 233     | 67             | 87      | 4.7          | 15      | 4.7     | 6                                            |
| C30                | Leg-3                 | 5                            | Blue          | 87                                  | 140     | 52             | 40      | 5.3          | 26      | 4.7     | 6                                            |
| C31                | Leg-4                 | 4                            | Blue          | 69                                  | 69      | 52             | 20      | 5.3          | 6.7     | 0.7     | 6                                            |
| C32                | Leg-5                 | 6                            | Blue          | 80                                  | 149     | 80             | 11      | 69.3         | 128     | 4.7     | 6                                            |
| C33                | Leg-6                 | 5                            | Blue          | 33                                  | 77      | 9.4            | 2.7     | 2.7          | 0.7     | 0.7     | 3                                            |
| C34                | Leg-7                 | 7                            | Blue          | 93                                  | 171     | 9.3            | 4.7     | 5.3          | 6.7     | 0.7     | 6                                            |
| C35                | Leg-8                 | 2                            | Blue          | 19                                  | 46      | 11             | 9.3     | 5.3          | 5.3     | 0.7     | 4                                            |
| C36                | Leg-9                 | 5                            | Blue          | 47                                  | 38      | 2.7            | 11      | 19           | 31      | 4.7     | 6                                            |
| C37                | Leg-10                | 5                            | Blue          | 47                                  | 128     | 40             | 68      | 14           | 5.3     | 2.7     | 5                                            |
| C38                | Leg-11                | 2                            | Blue          | 7.3                                 | 128     | 5.3            | 5.3     | 1.7          | 1.7     | 0.7     | 2                                            |
| C39                | Leg-12                | 4                            | Blue          | 27                                  | 53      | 1.3            | 1.3     | 6.7          | 32      | 1.3     | 6                                            |
| C40                | Leg-13                | 5                            | Blue          | 43                                  | 112     | 51             | 32      | 10           | 17      | 4.7     | 6                                            |
| C41                | Leg-14                | 2                            | Blue          | 29                                  | 32      | 6.7            | 1.3     | -0.7         | 3.2     | -0.7    | 3                                            |
| C42                | Leg-15                | 4                            | Blue          | 51                                  | 88      | 6.7            | 1.3     | -0.7         | -1.7    | 3.3     | 3                                            |
| C43                | Leg-16                | 2                            | Blue          | 17                                  | 75      | 6.7            | 4.7     | 9.4          | 6.7     | 3.3     | 6                                            |
| C44                | Leg-17                | 3                            | Blue          | 36                                  | 50      | 42             | 10      | 4.0          | 5.0     | 2.0     | 4                                            |
| C45                | Leg-18                | 2                            | Blue          | 24                                  | 32      | 10             | 36      | 12           | 12      | 4.7     | 6                                            |
| C46 <sup>[4]</sup> | Leg-19                | 5                            | Blue          | 50                                  | 60      | 50             | 48      | 64           | 72      | 24      | PR <sup>[4]</sup>                            |
| C47                | Leg-20                | 5                            | Blue          | 70                                  | 90      | 24             | 40      | 8.0          | 18      | 4.7     | 6                                            |

Supplementary Table C (Continued)

|                    |                       |                              |               | DSE Composite Scores <sup>[2]</sup> |         |                |             |              |             |             |                                     |
|--------------------|-----------------------|------------------------------|---------------|-------------------------------------|---------|----------------|-------------|--------------|-------------|-------------|-------------------------------------|
|                    |                       |                              |               | Low fluence                         |         | Medium fluence |             | High fluence |             | No Rx       |                                     |
| Lesion No. (final) | Lesion No. (original) | Diameter (mm) <sup>[1]</sup> | Type of Light | Visit 1                             | Visit 2 | Visit 3        | Visit 4     | Visit 5      | Visit 6     | Visit 7     | No. of Tx's to Clear <sup>[3]</sup> |
| C48                | Leg-21                | 4                            | Red           | 48                                  | 42      | 24             | 10          | 8.0          | <u>2.0</u>  | <u>0.0</u>  | 5                                   |
| C49                | Leg-22                | 4                            | Red           | 80                                  | 80      | 21             | 18          | 8.0          | 8.0         | <u>0.0</u>  | 6                                   |
| C50                | Leg-23                | 8                            | Red           | 128                                 | 96      | 24             | 48          | 8.0          | 5.0         | <u>0.0</u>  | 5                                   |
| C51                | Leg-24                | 4                            | Red           | 32                                  | 11      | <u>2.0</u>     | 5.0         | 2.0          | 18          | 4.7         | 6                                   |
| C52                | Leg-25                | 2                            | Red           | 16                                  | 84      | 12             | 12          | <u>2.0</u>   | 6.0         | 4.7         | 6                                   |
| C53                | Leg-26                | 4                            | Red           | 48                                  | 108     | 12             | 12          | 9.4          | <u>0.0</u>  | <u>2.0</u>  | 5                                   |
| C54                | Leg-27                | 7                            | Red           | 121                                 | 187     | 27             | 27          | 20           | 20.0        | 4.7         | 6                                   |
| C55                | Leg-28                | 3                            | Red           | 28                                  | 40      | 8.0            | 9.3         | 19           | 28.0        | 4.7         | 6                                   |
| C56                | Leg-29                | 5                            | Red           | 80                                  | 48      | 8.0            | 7.0         | 6.0          | 8.0         | <u>2.0</u>  | 6                                   |
| C57                | Leg-30                | 5                            | Red           | 50                                  | 90      | 4.0            | 6.0         | 8.0          | <u>2.0</u>  | <u>2.0</u>  | 5                                   |
| C58                | Leg-31                | 4                            | Red           | 40                                  | 64      | 6.0            | 6.0         | 8.0          | <u>2.0</u>  | <u>2.0</u>  | 5                                   |
| C59                | Leg-32                | 4                            | Red           | 32                                  | 60      | 6.0            | 6.0         | 8.0          | <u>2.0</u>  | <u>2.0</u>  | 5                                   |
| C60                | Leg-33                | 5                            | Red           | 60                                  | 24      | 6.0            | 6.0         | 8.0          | <u>2.0</u>  | <u>2.0</u>  | 5                                   |
| C61                | Leg-34                | 3                            | Red           | 36                                  | 36      | 6.0            | 6.0         | 8.0          | 4.0         | <u>2.0</u>  | 5                                   |
| C62                | Leg-35                | 4                            | Red           | 32                                  | 20      | 24             | 6.0         | 8.0          | <u>2.0</u>  | <u>2.0</u>  | 5                                   |
| C63                | Back-1                | 2                            | Red           | 11                                  | 31      | 23             | 15          | 6.6          | 6.6         | <u>1.7</u>  | 6                                   |
| C64                | Back-2                | 5                            | Red           | 77                                  | 92      | 11             | 43          | <u>-2.3</u>  | 24          | <u>1.7</u>  | 6                                   |
| C65                | Back-3                | 3                            | Red           | 18                                  | 140     | 18             | 45          | 11           | 93          | <u>0.0</u>  | 6                                   |
| C66                | Back-4                | 2                            | Red           | 32                                  | 42      | <u>3.0</u>     | 25          | <u>-7.3</u>  | <u>0.3</u>  | <u>0.0</u>  | 4                                   |
| C67                | Back-5                | 4                            | Red           | 20                                  | 84      | <u>3.0</u>     | 6.0         | <u>3.3</u>   | 32          | <u>2.0</u>  | 6                                   |
| C68                | Back-6                | 2                            | Red           | 7.0                                 | 7.0     | <u>1.0</u>     | <u>1.0</u>  | 4.0          | 3.0         | <u>0.0</u>  | 2                                   |
| C69                | Back-7                | 3                            | Red           | 36                                  | 128     | <u>0.0</u>     | <u>1.0</u>  | <u>3.7</u>   | <u>3.7</u>  | <u>2.0</u>  | 2                                   |
| C70                | Back-8                | 4                            | Red           | 24                                  | 60      | 9.0            | 28          | <u>1.3</u>   | 9.4         | <u>0.0</u>  | 6                                   |
| C71                | Back-9                | 4                            | Red           | 40                                  | 48      | 6.0            | 54          | <u>3.3</u>   | <u>3.3</u>  | <u>-2.0</u> | 4                                   |
| C72                | Back-10               | 2                            | Red           | 10                                  | 28      | <u>1.0</u>     | <u>0.0</u>  | <u>-2.3</u>  | 6.7         | <u>-2.0</u> | 6                                   |
| C73                | Back-11               | 6                            | Red           | 84                                  | 98      | 12             | 36          | 6.6          | 9.9         | <u>-2.0</u> | 6                                   |
| C74                | Back-12               | 3                            | Red           | 6.0                                 | 42      | <u>1.0</u>     | <u>-2.0</u> | <u>-2.3</u>  | 9.9         | <u>-4.0</u> | 6                                   |
| C75 <sup>[4]</sup> | Back-13               | 4                            | Red           | 20                                  | 144     | 15             | 16          | 8.6          | 93          | 9.0         | PR <sup>[4]</sup>                   |
| C76                | Back-14               | 3                            | Red           | 36                                  | 70      | 6.0            | 12          | 11           | 4.3         | <u>-4.0</u> | 5                                   |
| C77                | Back-15               | 2                            | Red           | 10                                  | 126     | 5.0            | 42          | 6.6          | 32          | <u>2.0</u>  | 6                                   |
| C78                | Back-16               | 2                            | Red           | 24                                  | 80      | 14             | 32          | 10           | 17          | <u>6.0</u>  | 6                                   |
| C79                | Back-17               | 4                            | Red           | 28                                  | 72      | 20             | 54          | 13           | 15          | <u>2.0</u>  | 6                                   |
| C80                | Back-18               | 4                            | Red           | 32                                  | 256     | 12             | 42          | 11           | 10          | <u>4.0</u>  | 6                                   |
| C81                | Back-19               | 3                            | Red           | 48                                  | 128     | 18             | 80          | 17           | 10          | <u>6.0</u>  | 6                                   |
| C82                | Back-20               | 2                            | Red           | 36                                  | 144     | 14             | 12          | <u>3.3</u>   | 6.7         | <u>4.0</u>  | 6                                   |
| C83                | Face-1                | 3                            | Red           | 7.0                                 | 147     | <u>2.3</u>     | 4.3         | 13           | <u>-2.3</u> | <u>-2.7</u> | 5                                   |
| C84                | Face-2                | 2                            | Red           | 17                                  | 26      | <u>2.3</u>     | 4.3         | 11           | <u>1.7</u>  | <u>-2.7</u> | 5                                   |
| C85                | Face-3                | 2                            | Red           | 28                                  | 84      | 4.0            | 4.0         | <u>1.3</u>   | <u>1.2</u>  | <u>0.0</u>  | 2                                   |
| C86                | Face-4                | 3                            | Red           | 27                                  | 80      | 4.0            | 5.0         | <u>3.3</u>   | <u>0.3</u>  | <u>0.0</u>  | 2                                   |

## FOOTNOTES TO SUPPLEMENTARY TABLE C.

- [1] Initial size of tumor (diameter, in millimeters).
- [2] DSE composite scores were calculated as product of (diameter) x (surface change) x (erythema). Numbers that are underlined correspond to lesions judged to be clinically undetectable on the day of that study visit. Numbers in **bold** indicate that the DSE score is above the DSE threshold of detection; the latter is defined as the mean of all the underlined DSE scores + 2 x (Std Dev). The threshold DSE score in this patient: mean  $\pm$  2 SD = **6.1**
- [3] Number of PDT treatments needed to clear the lesion. To be defined as a complete response, the DSE score had to be below the DSE threshold of detection at visit 7, or if the DSE score was below the threshold at an earlier visit, it had to remain below threshold at all subsequent visits.

PR, partial response. NR, nonresponse. CR, complete response.

- [4] These lesions looked suspicious and were biopsied with the following diagnostic results:

Lesion **C25**, arm (axillary fold): "BCC, micronodular" (red light)

Lesion **C46**, posterior calf: "BCC, superficial and nodular" (blue light)

Lesion **C75**, back: "BCC, nodular" (red light)

- [5] These lesions were flat and pink, with a normal epidermal surface at the last visit. They were biopsied with the following diagnostic results:

Lesion **C11**, arm: "telangiectasia and hyperkeratosis (benign)" (blue light)

Lesion **C13**, forearm: "capillary hemangioma (benign)" (blue light)

Lesions C11 and C13 were censored (not included as BCC tumors in the final analysis of CR's in Table II).
